# Supplementary material for: Thuniopsis: A New Orchid Genus and Phylogeny of the Tribe Arethuseae (Orchidaceae)
Source: PubMed Central journal article supplement (PMC4526666; doi:10.1371/journal.pone.0132777), 2015-08-05

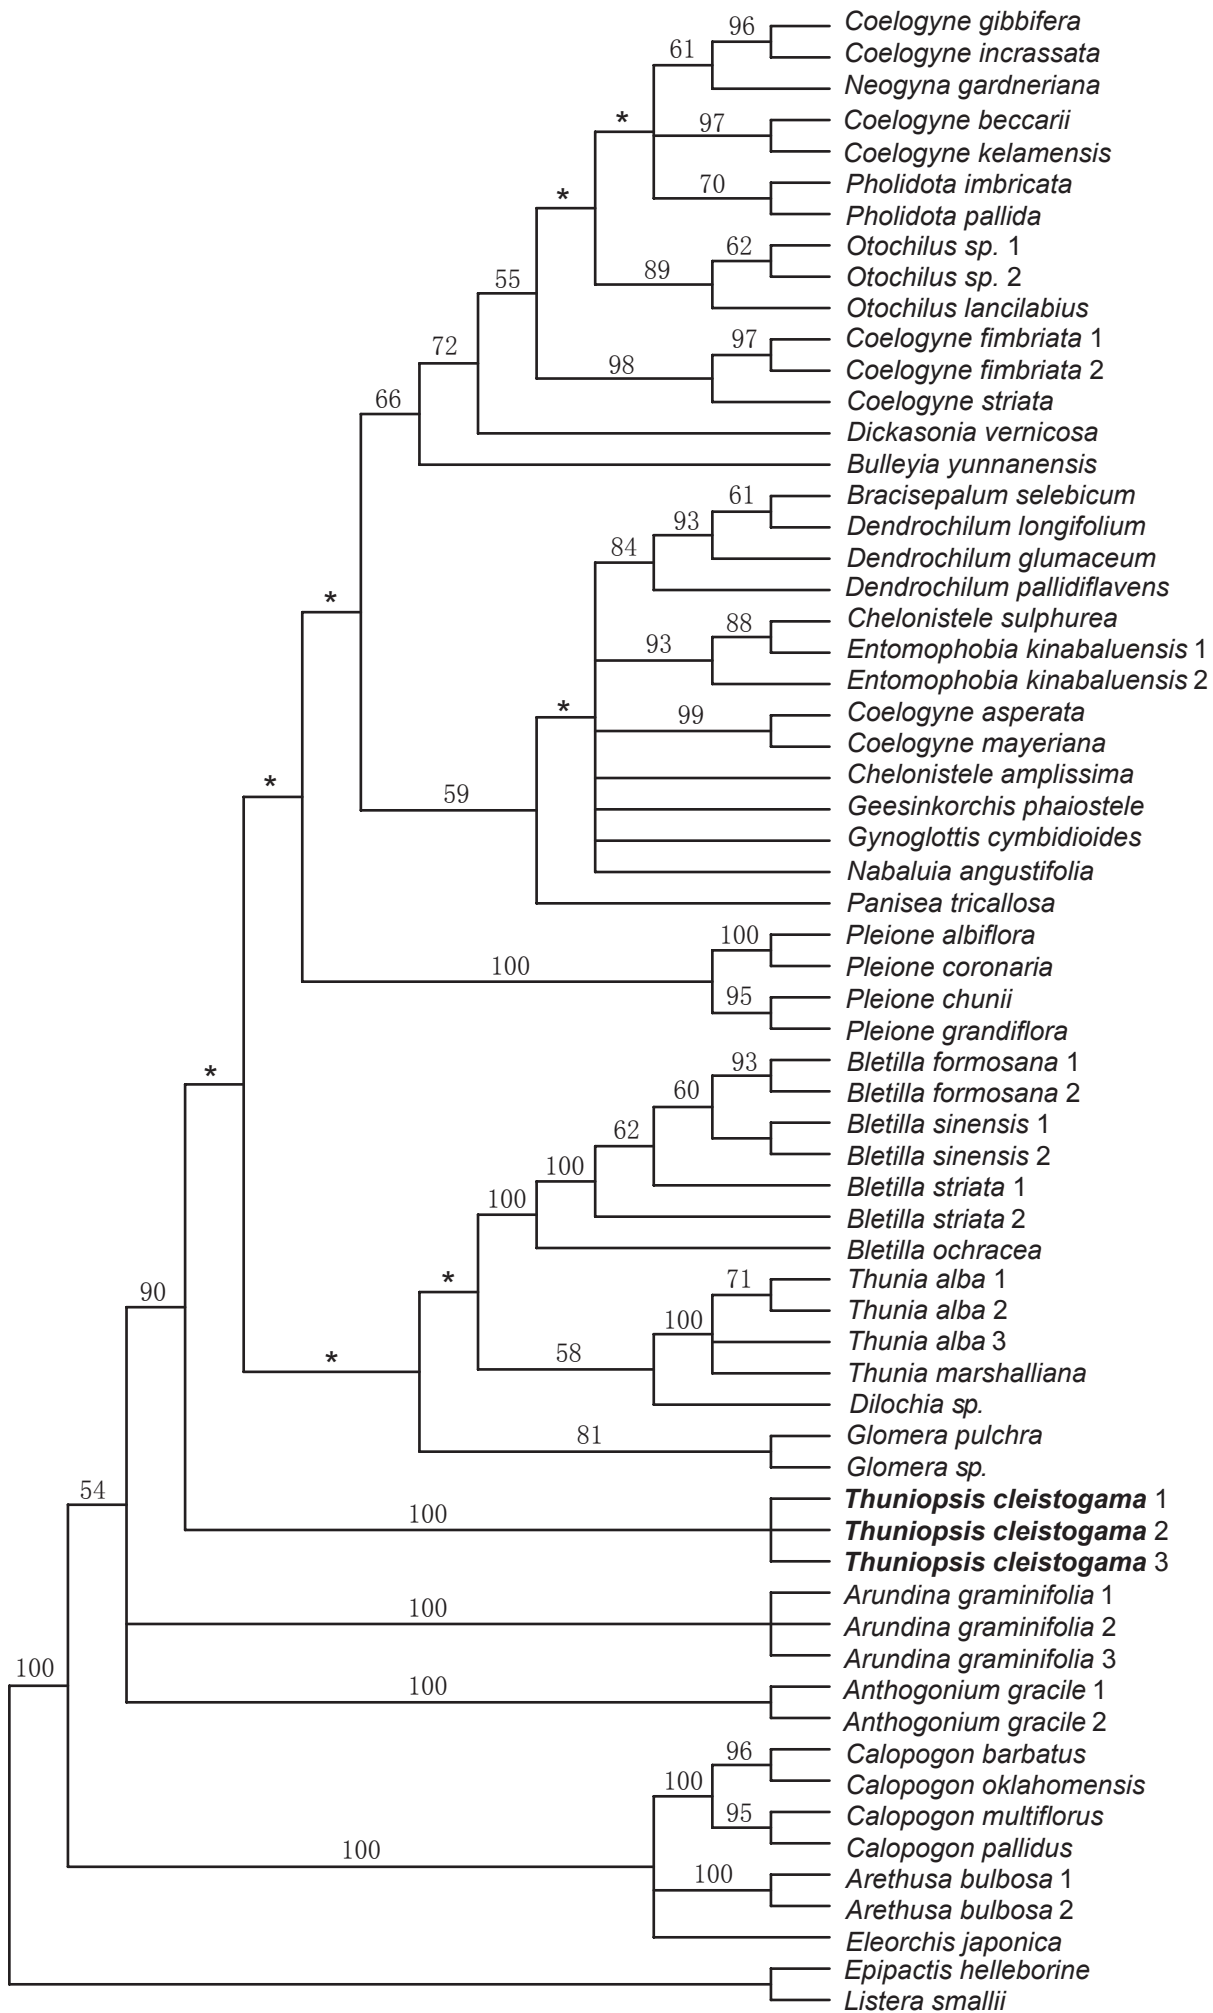

Supplement: pone.0132777.s001.pdf [file pone.0132777.s001.pdf]
